# Supplementary material for: Altered placental phenotype and increased risk of placental pathology in fetal spina bifida: a matched case-control study
Source: bioRxiv or medRxiv preprint supplement (doi:10.1101/2023.09.20.23295859), 2023-09-23
Supplement: Supplementary file [file media-1.pdf]

**Supplementary Table S1.** Associations between isolated spina bifida and placental characteristics and pathology in cases and controls.

|                                                    | PT controls (n=12)          | SB controls (n=10)             | Cases (n=12)                  | Unadjusted p value |                      | Adjusted p value † |                   |
|----------------------------------------------------|-----------------------------|--------------------------------|-------------------------------|--------------------|----------------------|--------------------|-------------------|
| <b>Placental anthropometry</b>                     |                             |                                |                               |                    |                      |                    |                   |
| Weight (g)                                         | 455 (378, 560) <sup>a</sup> | 352 (304, 399) <sup>b</sup>    | 263 (175, 370) <sup>b</sup>   | 0.006              |                      | 0.001              |                   |
| Missing (n [%])                                    | 0                           | 8 (80)                         | 2 (16.7)                      |                    |                      |                    |                   |
| zWeight *                                          | 1.3 (0.7, 2.2) <sup>a</sup> | -2.7 (-3.1, -2.4) <sup>b</sup> | -0.4 (-1.6, 0.2) <sup>b</sup> | 0.0003             |                      | 0.0003             |                   |
| Missing (n [%])                                    | 0                           | 8 (80)                         | 3 (25)                        |                    |                      |                    |                   |
| Birthweight: placental weight ratio                | 4.4 (4, 4.7) <sup>a</sup>   | 8.1 (7.8, 8.4) <sup>ab</sup>   | 5.5 (3.9, 7.4) <sup>b</sup>   | 0.1                |                      | 0.002              |                   |
| Missing (n [%])                                    | 0                           | 8 (80)                         | 2 (16.7)                      |                    |                      |                    |                   |
| <b>Placental histopathology</b>                    |                             |                                |                               |                    |                      |                    |                   |
| % Intervillous fibrinoid                           | 0 (0, 4.3) <sup>a</sup>     | 5 (5, 15) <sup>b</sup>         | 5 (5, 5) <sup>ab</sup>        | 0.0004             |                      | 0.003              |                   |
| % Stellate reticulum                               | 25 (10, 30)                 | 10 (8.8, 35)                   | 30 (16.3, 57.5)               | 0.13               |                      | 0.45               |                   |
| % Terminal villi                                   | 30 (30, 35)                 | 30 (20, 36.3)                  | 22.5 (11.3, 43.8)             | 0.7                |                      | 0.32               |                   |
| % Stem villi                                       | 15 (11.3, 20) <sup>a</sup>  | 10 (8.8, 10) <sup>b</sup>      | 5 (5, 8.8) <sup>b</sup>       | 0.0008             |                      | 0.0003             |                   |
| % Mature intermediate villi                        | 15 (11.3, 15)               | 10 (8.8, 11.3)                 | 10 (5, 10)                    | 0.02               |                      | 0.09               |                   |
| % Immature intermediate villi                      | 10 (5, 13.8) <sup>a</sup>   | 10 (5, 28.8) <sup>b</sup>      | 32.5 (6.3, 56.3) <sup>b</sup> | 0.1                |                      | 0.01               |                   |
| <b>Branching maturity score</b>                    |                             |                                |                               |                    |                      |                    |                   |
| Branching maturity score                           | 0.05 (0.03, 0.1)            | 0.04 (0.01, 0.1)               | 0.01 (0.003, 0.1)             | 0.18               |                      | 0.58               |                   |
| <b>Villous stromal maturity score</b>              |                             |                                |                               |                    |                      |                    |                   |
| Villous stromal maturity score                     | 0.1 (0.06, 0.3)             | 0.18 (0.1, 0.3)                | 0.06 (0.03, 0.1)              | 0.11               |                      | 0.66               |                   |
| <b>Syncytiotrophoblast maturity score</b>          |                             |                                |                               |                    |                      |                    |                   |
| Syncytiotrophoblast maturity score                 | 3 (2, 3)                    | 3.5 (3, 4)                     | 2 (1, 3)                      | 0.03               |                      | 0.75               |                   |
| <b>Odds of placental pathology in cases (n=12)</b> |                             |                                |                               |                    |                      |                    |                   |
|                                                    | PT controls (n=12)          | SB controls (n=10)             | Cases (n=12)                  | (vs. PT cons)      |                      | (vs. SB cons)      |                   |
| <b>Placental pathology</b>                         |                             |                                |                               | OR (95% CI)        | aOR (95% CI) †       | OR (95% CI)        | aOR (95% CI) †    |
| Hofbauer cells (n [%])                             |                             |                                |                               | 10 (1.7, 89.8)*    | 16.2 (1.4, 580)*     | 8 (1.3, 73.1)*     | 0.75 (0.03, 14.9) |
| Many                                               | 2 (16.7)                    | 2 (20)                         | 8 (66.7)                      |                    |                      |                    |                   |
| Few                                                | 10 (83.3)                   | 8 (80)                         | 4 (33.3)                      |                    |                      |                    |                   |
| Cytotrophoblast density (n [%])                    |                             |                                |                               | 11 (1.42, 235)*    | 14.9 (1.12, 609)*    | -                  | -                 |
| Thick                                              | 1 (8.33)                    | 0                              | 6 (50)                        |                    |                      |                    |                   |
| Thin/None                                          | 11 (91.7)                   | 10 (100)                       | 6 (50)                        |                    |                      |                    |                   |
| Syncytiotrophoblast density (n [%])                |                             |                                |                               | 15.4 (2, 332)**    | 146 (2.95, 3.46e5)** | 12.6 (1.6, 274)*   | 0.14 (0.0005, 11) |
| Thick                                              | 1 (8.3)                     | 1 (10)                         | 7 (58.3)                      |                    |                      |                    |                   |
| Thin                                               | 11 (91.7)                   | 9 (90)                         | 5 (41.7)                      |                    |                      |                    |                   |
| Vasculosyncytial membrane (n [%])                  |                             |                                |                               | 0.3 (0.03, 1.7)    | 0.09 (0.003, 1.2)    | 0.47 (0.05, 3.5)   | 22.5 (0.8, 1304)  |
| Many                                               | 5 (41.7)                    | 3 (30)                         | 2 (16.7)                      |                    |                      |                    |                   |
| Few/None                                           | 7 (58.3)                    | 7 (70)                         | 10 (83.3)                     |                    |                      |                    |                   |
| Villi capillarisation (n [%])                      |                             |                                |                               | -                  | -                    | -                  | -                 |
| Many                                               | 0                           | 2 (20)                         | 0                             |                    |                      |                    |                   |
| Few/None                                           | 12 (100)                    | 8 (80)                         | 12 (100)                      |                    |                      |                    |                   |
| Syncytial knots (n [%])                            |                             |                                |                               | 2.2 (0.18, 51.7)   | 1.69 (0.1, 51.1)     | 0.2 (0.02, 1.3)    | 6 (0.2, 369)      |
| Many                                               | 1 (8.3)                     | 5 (50)                         | 2 (16.7)                      |                    |                      |                    |                   |
| Few/None                                           | 11 (91.7)                   | 5 (50)                         | 10 (83.3)                     |                    |                      |                    |                   |

White et al. (2023) *Altered placental phenotype and increased risk of placental pathology in fetal spina bifida: a matched case-control study*

|                                           |          |          |           |                  |                   |                   |                   |
|-------------------------------------------|----------|----------|-----------|------------------|-------------------|-------------------|-------------------|
| Collagen in stem villi (n [%])            |          |          |           | -                | -                 | -                 | -                 |
| Lots                                      | 6 (50)   | 4 (40)   | 0         |                  |                   |                   |                   |
| Some/None                                 | 6 (50)   | 6 (60)   | 12 (100)  |                  |                   |                   |                   |
| Smooth muscle around stem vessels (n [%]) |          |          |           | 0.13 (0.006, 1)  | 0.1 (0.003, 0.9)* | 0.1 (0.004, 0.8)* | 0.8 (0.02, 18)    |
| Lots                                      | 5 (41.7) | 5 (50)   | 1 (8.3)   |                  |                   |                   |                   |
| Some/None                                 | 7 (58.3) | 5 (50)   | 11 (91.7) |                  |                   |                   |                   |
| Accelerated maturation (n [%])            |          |          |           | 0.1 (0.02, 0.9)* | 0.2 (0.02, 1.1)   | -                 | -                 |
| Yes                                       | 7 (58.3) | 0        | 2 (16.7)  |                  |                   |                   |                   |
| No                                        | 5 (41.7) | 10 (100) | 10 (83.3) |                  |                   |                   |                   |
| Distal villous hypoplasia (n [%])         |          |          |           | 0.2 (0.02, 1.2)  | 0.2 (0.02, 1.5)   | -                 | -                 |
| Any                                       | 6 (50)   | 0        | 2 (16.7)  |                  |                   |                   |                   |
| None                                      | 6 (50)   | 10 (100) | 10 (83.3) |                  |                   |                   |                   |
| Delayed villous maturation (n [%])        |          |          |           | -                | -                 | 0.8 (0.1, 7)      | 7 (0.11, 457)     |
| Yes                                       | 0        | 2 (20)   | 2 (16.7)  |                  |                   |                   |                   |
| No                                        | 12 (100) | 8 (80)   | 10 (83.3) |                  |                   |                   |                   |
| Maturation (n [%]) <sup>‡</sup>           |          |          |           |                  |                   |                   |                   |
| Immature                                  | 0        | 4 (40)   | 2 (16.7)  | -                | -                 | 0.5 (0.05, 3.7)   | 89.3 (0.3, 9.6e5) |
| Appropriate                               | 4 (33.3) | 6 (60)   | 6 (50)    |                  |                   |                   |                   |
| Hypermature                               | 8 (66.7) | 0        | 4 (33.3)  | 0.3 (0.1, 1.8)   | 0.9 (0.1, 9.5)    | -                 | -                 |

<sup>†</sup> Adjusted for infant sex and gestational age at delivery.

<sup>‡</sup> Reference group: appropriate maturity.

Continuous data are median (IQR) with p value for one-way analysis of variance (Unadjusted: ANOVA [normal distribution/equal variance] or Wilcoxon test [non-parametric data or outliers]; Adjusted: Multiple linear regression models). Categorical data are n (%) and odds ratios or adjusted odds ratios (95% CI) for presence of pathology in case placentae (reference groups: PT controls and SB controls) from Nominal Logistic regression models with p value from Likelihood Ratio Chi Square test. Statistical significance is denoted as \*p<.05, \*\*p<.01, \*\*\*p<.001. CI = confidence interval. OR = odds ratio. aOR = adjusted odds ratio.

**Supplementary Table S22.** Associations between isolated spina bifida and infant birth outcomes and placental phenotype in male cases and controls.

| <b>Infant outcomes at delivery</b>                | <b>Preterm controls<br/>(n=8)</b> | <b>SB controls<br/>(n=2)</b> | <b>Cases<br/>(n=4)</b>   | <b>Unadjusted<br/>p value</b>        | <b>Adjusted<br/>p value †</b> |                                      |                       |
|---------------------------------------------------|-----------------------------------|------------------------------|--------------------------|--------------------------------------|-------------------------------|--------------------------------------|-----------------------|
| Stillborn/TOP (n [%])                             | -                                 | -                            | 2 (50)                   | -                                    | -                             |                                      |                       |
| GA at birth (weeks) ‡                             | 33.2 (31.3, 34.6)                 | 39 (37.9, 40)                | 34.8 (33.5, 36.5)        | 0.03                                 | -                             |                                      |                       |
| <37 weeks GA at birth (n [%])                     | 8 (100)                           | 0                            | 3 (75)                   | 0.007                                | -                             |                                      |                       |
| Sub-categories of PT birth (n [%])                |                                   |                              |                          | 0.06                                 | -                             |                                      |                       |
| Moderate/late PT (32-36 weeks GA)                 | 5 (62.5)                          | 0                            | 3 (75)                   |                                      |                               |                                      |                       |
| Very PT (28-32 weeks GA)                          | 2 (25)                            | 0                            | 0                        |                                      |                               |                                      |                       |
| Extremely PT (<28 weeks GA)                       | 1 (12.5)                          | 0                            | 0                        |                                      |                               |                                      |                       |
| Birthweight z score                               | 0.32 (-0.35, 0.46)                | -1.81 (-2.07, -1.54)         | -0.1 (-0.24, 1.03)       | 0.007                                | -                             |                                      |                       |
| Apgar at one minute (/10)                         | 9 (4, 9)                          | 6.5 (4, 9)                   | 8 (7, 9)                 | 0.94                                 | 0.24                          |                                      |                       |
| Apgar score <7 (n [%])                            | 3 (37.5)                          | 1 (50)                       | 0                        | 0.23                                 | 0.08                          |                                      |                       |
| Missing (n [%])                                   | 1 (12.5)                          | 0                            | 1 (25)                   |                                      |                               |                                      |                       |
| Apgar at five minutes (/10)                       | 9 (8, 9)                          | 9 (9, 9)                     | 9 (9, 9)                 | 0.27                                 | 0.41                          |                                      |                       |
| Apgar score <7 (n [%])                            | 0                                 | 0                            | 0                        | -                                    | -                             |                                      |                       |
| Missing (n [%])                                   | 1 (12.5)                          | 0                            | 1 (25)                   |                                      |                               |                                      |                       |
| <b>Placental anthropometry</b>                    |                                   |                              |                          |                                      |                               |                                      |                       |
| Weight (g)                                        | 450 (378, 500)                    | 304                          | 363 (265, 461)           | 0.37                                 | 0.24                          |                                      |                       |
| Missing (n [%])                                   | 0                                 | 1 (50)                       | 1 (25)                   |                                      |                               |                                      |                       |
| zWeight *                                         | 1.12 (0.66, 2.23)                 | -3.08                        | -0.34 (-2.58, 0.41)      | 0.047                                | -                             |                                      |                       |
| Missing (n [%])                                   | 0                                 | 1 (50)                       | 1 (25)                   |                                      |                               |                                      |                       |
| Birthweight: placental weight ratio               | 4.58 (4.1, 5.25)                  | 7.83                         | 6.94 (5.79, 9.4)         | 0.06                                 | 0.18                          |                                      |                       |
| Missing (n [%])                                   | 0                                 | 1 (50)                       | 1 (25)                   |                                      |                               |                                      |                       |
| <b>Placental pathology</b>                        |                                   |                              |                          |                                      |                               |                                      |                       |
| % Intervillous fibrinoid                          | 0 (0, 3.75) <sup>a</sup>          | 12.5 (10, 15) <sup>b</sup>   | 5 (5, 5) <sup>c</sup>    | 0.01                                 | 0.0005                        |                                      |                       |
| % Stellate reticulum                              | 17.5 (10, 30)                     | 30 (10, 50)                  | 20 (7.5, 36.3)           | 0.85                                 | 0.55                          |                                      |                       |
| % Terminal villi                                  | 32.5 (30, 38.8)                   | 25 (20, 30)                  | 35 (21.3, 60)            | 0.5                                  | 0.66                          |                                      |                       |
| % Stem villi                                      | 15 (10, 18.8) <sup>a</sup>        | 12.5 (10, 15) <sup>ab</sup>  | 5 (5, 12.5) <sup>b</sup> | 0.18                                 | 0.04                          |                                      |                       |
| % Mature intermediate villi                       | 15 (15, 18.8)                     | 12.5 (5, 20)                 | 12.5 (6.25, 18.8)        | 0.63                                 | 0.58                          |                                      |                       |
| % Immature intermediate villi                     | 7.5 (5, 13.8)                     | 22.5 (5, 40)                 | 15 (3.5, 40)             | 0.71                                 | 0.81                          |                                      |                       |
| Branching maturity score                          | 0.07 (0.03, 0.11)                 | 0.04 (0.006, 0.08)           | 0.08 (0.008, 0.15)       | 0.58                                 | 0.82                          |                                      |                       |
| Villous stromal maturity score                    | 0.18 (0.06, 0.27)                 | 0.16 (0.04, 0.27)            | 0.1 (0.06, 0.28)         | 0.9                                  | 0.48                          |                                      |                       |
| Syncytiotrophoblast maturity score                | 3 (2.25, 3)                       | 3 (3, 3)                     | 2.5 (2, 3.75)            | 0.85                                 | 0.2                           |                                      |                       |
| <b>Odds of placental pathology in cases (n=4)</b> |                                   |                              |                          |                                      |                               |                                      |                       |
|                                                   | <b>PT controls (n=8)</b>          | <b>SB controls (n=2)</b>     | <b>Cases (n=4)</b>       | <b>(vs. PT cons)<br/>OR (95% CI)</b> | <b>aOR (95% CI) †</b>         | <b>(vs. SB cons)<br/>OR (95% CI)</b> | <b>aOR (95% CI) †</b> |
| <b>Placental pathology</b>                        |                                   |                              |                          |                                      |                               |                                      |                       |
| Hofbauer cells (n [%])                            |                                   |                              |                          |                                      |                               |                                      |                       |
| Many                                              | 1 (12.5)                          | 0                            | 2 (50)                   | 7 (0.45, 211)                        | 10.9 (0.43, 1120)             | -                                    | -                     |

White et al. (2023) *Altered placental phenotype and increased risk of placental pathology in fetal spina bifida: a matched case-control study*

|                                                  |          |         |         |                   |                   |   |   |
|--------------------------------------------------|----------|---------|---------|-------------------|-------------------|---|---|
| Few                                              | 7 (87.5) | 2 (100) | 2 (50)  |                   |                   |   |   |
| <b>Cytotrophoblast density (n [%])</b>           |          |         |         |                   |                   |   |   |
| Thick                                            | 0        | 0       | 2 (50)  | -                 | -                 | - | - |
| Thin/None                                        | 8 (100)  | 2 (100) | 2 (50)  |                   |                   |   |   |
| <b>Syncytiotrophoblast density (n [%])</b>       |          |         |         |                   |                   |   |   |
| Thick                                            | 0        | 0       | 2 (50)  | -                 | -                 | - | - |
| Thin                                             | 8 (100)  | 2 (100) | 2 (50)  |                   |                   |   |   |
| <b>Vasculosyncytial membrane (n [%])</b>         |          |         |         |                   |                   |   |   |
| Many                                             | 4 (50)   | 0       | 0       | -                 | -                 | - | - |
| Few/None                                         | 4 (50)   | 2 (100) | 4 (100) |                   |                   |   |   |
| <b>Villi capillarisation (n [%])</b>             |          |         |         |                   |                   |   |   |
| Many                                             | 0        | 0       | 0       | -                 | -                 | - | - |
| Few/None                                         | 8 (100)  | 2 (100) | 4 (100) |                   |                   |   |   |
| <b>Syncytial knots (n [%])</b>                   |          |         |         |                   |                   |   |   |
| Many                                             | 1 (12.5) | 0       | 1 (25)  | -                 | -                 | - | - |
| Few/None                                         | 7 (87.5) | 2 (100) | 3 (75)  |                   |                   |   |   |
| <b>Collagen in stem villi (n [%])</b>            |          |         |         |                   |                   |   |   |
| Lots                                             | 4 (50)   | 1 (50)  | 0       | -                 | -                 | - | - |
| Some/None                                        | 4 (50)   | 1 (50)  | 4 (100) |                   |                   |   |   |
| <b>Smooth muscle around stem vessels (n [%])</b> |          |         |         |                   |                   |   |   |
| Lots                                             | 3 (37.5) | 1 (50)  | 0       | -                 | -                 | - | - |
| Some/None                                        | 5 (62.5) | 1 (50)  | 4 (100) |                   |                   |   |   |
| <b>Accelerated maturation (n [%])</b>            |          |         |         |                   |                   |   |   |
| Yes                                              | 5 (62.5) | 0       | 1 (25)  | 0.2 (0.008, 2.43) | 0.59 (0.02, 13.5) | - | - |
| No                                               | 3 (37.5) | 2 (100) | 3 (75)  |                   |                   |   |   |
| <b>Distal villous hyperplasia (n [%])</b>        |          |         |         |                   |                   |   |   |
| Any                                              | 4 (50)   | 0       | 1 (25)  | 0.33 (0.01, 4.05) | 0.93 (0.03, 23.1) | - | - |
| None                                             | 4 (50)   | 2 (100) | 3 (75)  |                   |                   |   |   |
| <b>Delayed villous maturation (n [%])</b>        |          |         |         |                   |                   |   |   |
| Yes                                              | 0        | 0       | 2 (50)  | -                 | -                 | - | - |
| No                                               | 8 (100)  | 2 (100) | 2 (50)  |                   |                   |   |   |
| <b>Maturation (n [%])<sup>‡</sup></b>            |          |         |         |                   |                   |   |   |
| Immature                                         | 0        | 1 (50)  | 2 (50)  | -                 | -                 | - | - |
| Appropriate                                      | 2 (25)   | 1 (50)  | 0       |                   |                   |   |   |
| Hypermaturation                                  | 6 (75)   | 0       | 2 (50)  | -                 | -                 | - | - |

<sup>†</sup> Adjusted for gestational age at delivery.

<sup>‡</sup> Reference group: appropriate maturity.

Continuous data are median (IQR) with p value for one-way analysis of variance (Unadjusted: ANOVA [normal distribution/equal variance] or Wilcoxon test [non-parametric data or outliers]; Adjusted: Standard Least Squares models). Group differences from adjusted post-hoc tests (Tukey HSD) are indicated by different subscript letters. No letters = no group differences. Categorical data are n (%) and odds ratios or adjusted odds ratios (95% CI) for presence of pathology in case placentae (reference groups: PT controls and SB controls) from Nominal Logistic regression models with p value from Likelihood Ratio Chi Square test. A ‘-’ indicates that data were unavailable. Statistical significance is denoted as \*p<.05, \*\*p<.01, \*\*\*p<.001. CI = confidence interval. PT = preterm. SB = spina bifida. TOP = termination of pregnancy. OR = odds ratio. aOR = adjusted odds ratio.

**Supplementary Table S23.** Associations between isolated spina bifida and infant birth outcomes and placental phenotype in female cases and controls.

| <b>Infant outcomes at delivery</b>                | <b>Preterm controls<br/>(n=4)</b> | <b>SB controls<br/>(n=8)</b> | <b>Cases<br/>(n=8)</b>      | <b>Unadjusted<br/>p value</b>        |                      | <b>Adjusted<br/>p value †</b>        |                      |
|---------------------------------------------------|-----------------------------------|------------------------------|-----------------------------|--------------------------------------|----------------------|--------------------------------------|----------------------|
| Stillborn/TOP (n [%])                             | -                                 | 1 (12.5)                     | 1 (12.5)                    | -                                    | -                    | -                                    | -                    |
| GA at birth (weeks) ‡                             | 33.7 (26.8, 35.9)                 | 39.7 (38.9, 40.2)            | 27.2 (22.5, 35)             | 0.0009                               | -                    | -                                    | -                    |
| <37 weeks GA at birth (n [%])                     | 4 (100)                           | 0                            | 7 (87.5)                    | 0.0001                               | -                    | -                                    | -                    |
| Sub-categories of PT birth (n [%])                |                                   |                              |                             | 0.0007                               | -                    | -                                    | -                    |
| Moderate/late PT (32-36 weeks GA)                 | 2 (50)                            | 0                            | 1 (12.5)                    |                                      |                      |                                      |                      |
| Very PT (28-32 weeks GA)                          | 1 (25)                            | 0                            | 2 (25)                      |                                      |                      |                                      |                      |
| Extremely PT (<28 weeks GA)                       | 1 (25)                            | 0                            | 4 (50)                      |                                      |                      |                                      |                      |
| Birthweight z score                               | 0.1 (-0.73, 0.99)                 | 0.16 (-0.5, 0.45)            | -0.58 (-0.71, 0.17)         | 0.3                                  | -                    | -                                    | -                    |
| Apgar at one minute (/10)                         | 7.5 (5.5, 8)                      | 9 (9, 9)                     | 8 (4, 9)                    | 0.08                                 | -                    | -                                    | 0.16                 |
| Apgar score <7 (n [%])                            | 1 (25)                            | 1 (12.5)                     | 1 (12.5)                    | 0.72                                 | -                    | -                                    | 0.27                 |
| Missing (n [%])                                   | 0                                 | 0                            | 5 (62.5)                    |                                      |                      |                                      |                      |
| Apgar at five minutes (/10)                       | 9 (6.75, 9)                       | 9 (9, 9)                     | 9 (9, 9)                    | 0.25                                 | -                    | -                                    | 0.1                  |
| Apgar score <7 (n [%])                            | 1 (25)                            | 0                            | 0                           | 0.24                                 | -                    | -                                    | 1                    |
| Missing (n [%])                                   | 0                                 | 0                            | 5 (62.5)                    |                                      |                      |                                      |                      |
| <b>Placental anthropometry</b>                    |                                   |                              |                             |                                      |                      |                                      |                      |
| Weight (g)                                        | 495 (305, 633) <sup>a</sup>       | 399 <sup>ab</sup>            | 221 (147, 283) <sup>b</sup> | 0.03                                 | -                    | -                                    | 0.01                 |
| Missing (n [%])                                   | 0                                 | 7 (87.5)                     | 1 (12.5)                    |                                      |                      |                                      |                      |
| zWeight <sup>*</sup>                              | 1.46 (0.79, 2.88)                 | -2.35                        | -0.62 (-1.24, 0.03)         | 0.007                                | -                    | -                                    | -                    |
| Missing (n [%])                                   | 0                                 | 7 (87.5)                     | 2 (25)                      |                                      |                      |                                      |                      |
| Birthweight: placental weight ratio               | 4.18 (3.23, 4.58)                 | 8.37                         | 4.1 (3.53, 6.25)            | 0.39                                 | -                    | -                                    | 0.03                 |
| Missing (n [%])                                   | 0                                 | 7 (87.5)                     | 1 (12.5)                    |                                      |                      |                                      |                      |
| <b>Placental pathology</b>                        |                                   |                              |                             |                                      |                      |                                      |                      |
| % Intervillous fibrinoid                          | 1 (0, 4.25)                       | 5 (5, 12.5)                  | 5 (1.25, 8.75)              | 0.06                                 | -                    | -                                    | 0.19                 |
| % Stellate reticulum                              | 27.5 (13.8, 41.3)                 | 10 (6.25, 26.3)              | 40 (22.5, 67.5)             | 0.05                                 | -                    | -                                    | 0.81                 |
| % Terminal villi                                  | 30 (18.8, 30)                     | 32.5 (22.5, 38.8)            | 15 (10, 36.3)               | 0.39                                 | -                    | -                                    | 0.47                 |
| % Stem villi                                      | 17.5 (15, 20) <sup>a</sup>        | 10 (6.25, 10) <sup>b</sup>   | 5 (5, 8.75) <sup>b</sup>    | 0.004                                | -                    | -                                    | 0.0002               |
| % Mature intermediate villi                       | 12.5 (6.25, 15)                   | 10 (10, 10)                  | 7.5 (5, 10)                 | 0.13                                 | -                    | -                                    | 0.23                 |
| % Immature intermediate villi                     | 10 (6.25, 32.5)                   | 10 (5, 21.3)                 | 37.5 (15, 63.8)             | 0.08                                 | -                    | -                                    | 0.15                 |
| Branching maturity score                          | 0.04 (0.01, 0.07)                 | 0.04 (0.02, 0.1)             | 0.007 (0.002, 0.04)         | 0.14                                 | -                    | -                                    | 0.81                 |
| Villous stromal maturity score                    | 0.09 (0.05, 0.23)                 | 0.18 (0.08, 0.44)            | 0.05 (0.02, 0.09)           | 0.04                                 | -                    | -                                    | 0.59                 |
| Syncytiotrophoblast maturity score                | 2.5 (1.25, 3)                     | 4 (3, 4)                     | 1.5 (1, 3)                  | 0.03                                 | -                    | -                                    | 0.75                 |
| <b>Odds of placental pathology in cases (n=8)</b> |                                   |                              |                             |                                      |                      |                                      |                      |
|                                                   | <b>Preterm controls<br/>(n=4)</b> | <b>SB controls<br/>(n=8)</b> | <b>Cases<br/>(n=8)</b>      | <b>(vs. PT cons)<br/>OR (95% CI)</b> |                      | <b>(vs. SB cons)<br/>OR (95% CI)</b> |                      |
| <b>Placental pathology</b>                        |                                   |                              |                             | <b>aOR (95% CI)†</b>                 | <b>aOR (95% CI)†</b> | <b>aOR (95% CI)†</b>                 | <b>aOR (95% CI)†</b> |
| Hofbauer cells (n [%])                            |                                   |                              |                             |                                      |                      |                                      |                      |
| Many                                              | 1 (25)                            | 2 (25)                       | 6 (75)                      | 9 (0.7, 258)                         | 15.9 (0.21, 40640)   | 9 (1.09, 115)*                       | 0.12 (0.0002, 6.57)  |

White et al. (2023) *Altered placental phenotype and increased risk of placental pathology in fetal spina bifida: a matched case-control study*

|                                           |         |          |          |                    |                     |                     |                         |
|-------------------------------------------|---------|----------|----------|--------------------|---------------------|---------------------|-------------------------|
| Few                                       | 3 (75)  | 6 (75)   | 2 (25)   |                    |                     |                     |                         |
| Cytotrophoblast density (n [%])           |         |          |          |                    |                     |                     |                         |
| Thick                                     | 1 (25)  | 0        | 4 (50)   | 3 (0.25, 76.6)     | 0.79 (0.006, 46.9)  | -                   | -                       |
| Thin/None                                 | 3 (75)  | 8 (100)  | 4 (50)   |                    |                     |                     |                         |
| Syncytiotrophoblast density (n [%])       |         |          |          |                    |                     |                     |                         |
| Thick                                     | 1 (25)  | 1 (12.5) | 5 (62.5) | 5 (0.41, 131)      | 5.23 (2.78, 1.44e8) | 11.7 (1.21, 283)*   | 1.18e-5 (5.71e-17, 0.8) |
| Thin                                      | 3 (75)  | 7 (87.5) | 3 (37.5) |                    |                     |                     |                         |
| Vasculosyncytial membrane (n [%])         |         |          |          |                    |                     |                     |                         |
| Many                                      | 1 (25)  | 3 (37.5) | 2 (25)   | 1 (0.06, 26.8)     | 8.07 (0.68, 28792)  | 0.56 (0.05, 4.72)   | 470 (2, 4.08e8)         |
| Few/None                                  | 3 (75)  | 5 (62.5) | 6 (75)   |                    |                     |                     |                         |
| Villi capillarisation (n [%])             |         |          |          |                    |                     |                     |                         |
| Many                                      | 0       | 2 (25)   | 0        | -                  | -                   | -                   | -                       |
| Few/None                                  | 4 (100) | 6 (75)   | 8 (100)  |                    |                     |                     |                         |
| Syncytial knots (n [%])                   |         |          |          |                    |                     |                     |                         |
| Many                                      | 0       | 5 (63.5) | 1 (12.5) | -                  | -                   | 0.09 (0.004, 0.83)* | 1.5 (0.02, 165)         |
| Few/None                                  | 4 (100) | 3 (37.5) | 7 (87.5) |                    |                     |                     |                         |
| Collagen in stem villi (n [%])            |         |          |          |                    |                     |                     |                         |
| Lots                                      | 2 (50)  | 3 (37.5) | 0        | -                  | -                   | -                   | -                       |
| Some/None                                 | 2 (50)  | 5 (62.5) | 8 (100)  |                    |                     |                     |                         |
| Smooth muscle around stem vessels (n [%]) |         |          |          |                    |                     |                     |                         |
| Lots                                      | 2 (50)  | 4 (50)   | 1 (12.5) | 0.14 (0.005, 2.24) | 0.16 (0.002, 4.79)  | 0.14 (0.006, 1.39)  | 2.43 (0.05, 141)        |
| Some/None                                 | 2 (50)  | 4 (50)   | 7 (87.5) |                    |                     |                     |                         |
| Accelerated maturation (n [%])            |         |          |          |                    |                     |                     |                         |
| Yes                                       | 2 (50)  | 0        | 1 (12.5) | 0.14 (0.005, 2.24) | 0.18 (0.003, 4.67)  | -                   | -                       |
| No                                        | 2 (50)  | 8 (100)  | 7 (87.5) |                    |                     |                     |                         |
| Distal villous hyperplasia (n [%])        |         |          |          |                    |                     |                     |                         |
| Any                                       | 2 (50)  | 0        | 1 (12.5) | 0.14 (0.005, 2.24) | 0.18 (0.003, 4.67)  | -                   | -                       |
| None                                      | 2 (50)  | 8 (100)  | 7 (87.5) |                    |                     |                     |                         |
| Delayed villous maturation (n [%])        |         |          |          |                    |                     |                     |                         |
| Yes                                       | 0       | 2 (25)   | 0        | -                  | -                   | -                   | -                       |
| No                                        | 4 (100) | 6 (75)   | 8 (100)  |                    |                     |                     |                         |
| Maturation (n [%]) <sup>‡</sup>           |         |          |          |                    |                     |                     |                         |
| Immature                                  | 0       | 3 (37.5) | 0        | -                  | -                   | -                   | -                       |
| Appropriate                               | 2 (50)  | 5 (62.5) | 6 (75)   |                    |                     |                     |                         |
| Hyper mature                              | 2 (50)  | 0        | 2 (25)   | 0.33 (0.02, 4.31)  | 0.46 (0.03, 7.3)    | -                   | -                       |

<sup>†</sup> Adjusted for gestational age at delivery.

<sup>‡</sup> Reference group: appropriate maturity.

Continuous data are median (IQR) with p value for one-way analysis of variance (Unadjusted: ANOVA [normal distribution/equal variance] or Wilcoxon test [non-parametric data or outliers]; Adjusted: Standard Least Squares models). Group differences from adjusted post-hoc tests (Tukey HSD) are indicated by different subscript letters. No letters = no group differences. Categorical data are n (%) and odds ratios or adjusted odds ratios (95% CI) for presence of pathology in case placentae (reference groups: PT controls and SB controls) from Nominal Logistic regression models with p value from Likelihood Ratio Chi Square test. A '-' indicates that data were unavailable. Statistical significance is denoted as \*p<.05, \*\*p<.01, \*\*\*p<.001. CI = confidence interval. PT = preterm. SB = spina bifida. TOP = termination of pregnancy. OR = odds ratio. aOR = adjusted odds ratio.
